# Supplementary material for: Adaptive Channel Selection for Robust Visual Object Tracking with Discriminative Correlation Filters
Source: Springer Nature journal article supplement (doi:10.1007/s11263-021-01435-1), 2021-02-04
Supplement: MOESM1 [file 18834600]

# Adaptive Channel Selection for Robust Visual Object Tracking with Discriminative Correlation Filters

## Supplementary Material

Tianyang Xu · Zhen-Hua Feng ·  
Xiao-Jun Wu · Josef Kittler

Received: date / Accepted: date

### 1 Optimisation Details

The augmented Lagrangian is as follows:

$$\begin{aligned} \mathcal{L}(\mathcal{W}, \mathcal{W}', \Gamma, \mu) = & \left\| \sum_{j=1}^C \mathbf{W}^j \circledast \mathbf{X}^j - \mathbf{Y} \right\|_F^2 + \lambda_1 \sum_{j=1}^C \|\mathbf{W}'^j\|_F \\ & + \lambda_2 \sum_{j=1}^C \|\mathbf{W}^j - \mathbf{W}_{t-1}^j\|_F^2 + \frac{\mu}{2} \sum_{j=1}^C \left\| \mathbf{W}^j - \mathbf{W}'^j + \frac{\Gamma^j}{\mu} \right\|_F^2, \end{aligned} \quad (1)$$

where  $\mathbf{X}^j \in \mathbb{R}^{N \times N}$  is the  $j$ th channel of the input tensor (feature)  $\mathcal{X} \in \mathbb{R}^{N \times N \times C}$  and  $\mathbf{W}^j \in \mathbb{R}^{N \times N}$  is the  $j$ th channel of the filter tensor  $\mathcal{W} \in \mathbb{R}^{N \times N \times C}$ . We introduce the slack variable,  $\mathcal{W}' = \mathcal{W}$ .  $\mathbf{Y} \in \mathbb{R}^{N \times N}$  denotes the desirable Gaussian-shape response map (Henriques et al., 2015).  $\Gamma$  is the Lagrangian multiplier of the same size as  $\mathcal{W}$ , and  $\mu$  is the corresponding penalty.

---

T. Xu  
Centre for Vision, Speech and Signal Processing  
University of Surrey, Guildford GU2 7XH, UK.  
E-mail: tianyang.xu@surrey.ac.uk

Z.H. Feng  
Department of Computer Science &  
Centre for Vision, Speech and Signal Processing  
University of Surrey, Guildford GU2 7XH, UK.  
E-mail: z.feng@surrey.ac.uk

J. Kittler  
Centre for Vision, Speech and Signal Processing  
University of Surrey, Guildford GU2 7XH, UK.  
E-mail: j.kittler@surrey.ac.uk

X.J. Wu  
School of Artificial Intelligence and Computer Science  
Jiangnan University, Wuxi 214122, China.  
E-mail: wu\_xiaojun@jiangnan.edu.cn

To optimise the objective (Eqn. 1), we use the alternating direction method of multipliers (ADMM) (Boyd et al., 2010) to iteratively solve the following sub-problems:

$$\begin{cases} \mathcal{W} = \arg \min_{\mathcal{W}} \mathcal{L}(\mathcal{W}, \mathcal{W}', \Gamma, \mu) \\ \mathcal{W}' = \arg \min_{\mathcal{W}'} \mathcal{L}(\mathcal{W}, \mathcal{W}', \Gamma, \mu) \\ \Gamma = \arg \min_{\Gamma} \mathcal{L}(\mathcal{W}, \mathcal{W}', \Gamma, \mu) \end{cases} \quad (2)$$

### 1.1 Updating $\mathcal{W}$

To optimise  $\mathcal{W}$ , we solve the following sub-problem:

$$\begin{aligned} \mathcal{W} = \arg \min_{\mathcal{W}} & \left\| \sum_{j=1}^C \mathbf{W}^j \oplus \mathbf{X}^j - \mathbf{Y} \right\|_F^2 + \lambda_2 \sum_{j=1}^C \left\| \mathbf{W}^j - \mathbf{W}_{t-1}^j \right\|_F^2 \\ & + \frac{\mu}{2} \sum_{j=1}^C \left\| \mathbf{W}^j - \mathbf{W}'^j + \frac{\Gamma^j}{\mu} \right\|_F^2, \end{aligned} \quad (3)$$

To efficiently solve Eqn. 3, we transfer the objective to the frequency domain by employing the circulant structure (Gray, 2006):

$$\begin{aligned} \hat{\mathcal{W}} = \arg \min_{\hat{\mathcal{W}}} & \left\| \sum_{j=1}^C \hat{\mathbf{W}}^j \odot \hat{\mathbf{X}}^j - \hat{\mathbf{Y}} \right\|_F^2 + \lambda_2 \sum_{j=1}^C \left\| \hat{\mathbf{W}}^j - \hat{\mathbf{W}}_{t-1}^j \right\|_F^2 \\ & + \frac{\mu}{2} \sum_{j=1}^C \left\| \hat{\mathbf{W}}^j - \hat{\mathbf{W}}'^j + \frac{\hat{\Gamma}^j}{\mu} \right\|_F^2. \end{aligned} \quad (4)$$

Note that the symbol  $\hat{\cdot}$  stands for the corresponding Fourier representation in the frequency domain (Henriques et al., 2015). We perform vectorisation of the variables involved as follows,

$$\begin{aligned} \mathbf{A} &= \left[ \text{diag} \left( \text{Vec} \left( \hat{\mathbf{X}}^{1\top} \right) \right), \text{diag} \left( \text{Vec} \left( \hat{\mathbf{X}}^{2\top} \right) \right), \dots, \text{diag} \left( \text{Vec} \left( \hat{\mathbf{X}}^{C\top} \right) \right) \right] \in \mathbb{C}^{N^2 \times CN^2}, \\ \mathbf{f} &= \left[ \text{Vec} \left( \hat{\mathbf{W}}^{1\top} \right), \text{Vec} \left( \hat{\mathbf{W}}^{2\top} \right), \dots, \text{Vec} \left( \hat{\mathbf{W}}^{C\top} \right) \right] \in \mathbb{C}^{CN^2}, \\ \mathbf{r} &= \left[ \text{Vec} \left( \hat{\Gamma}^{1\top} \right), \text{Vec} \left( \hat{\Gamma}^{2\top} \right), \dots, \text{Vec} \left( \hat{\Gamma}^{C\top} \right) \right] \in \mathbb{C}^{CN^2}, \\ \mathbf{b} &= \text{Vec} \left( \hat{\mathbf{Y}} \right) \in \mathbb{C}^{N^2} \end{aligned}$$

For each  $j = 1, 2, \dots, C$ ,  $\text{Vec} \left( \hat{\mathbf{X}}^{j\top} \right) \in \mathbb{C}^{N^2}$ ,  $\text{Vec} \left( \hat{\mathbf{W}}^{j\top} \right) \in \mathbb{C}^{N^2}$ , and  $\text{Vec} \left( \hat{\Gamma}^{j\top} \right) \in \mathbb{C}^{N^2}$ .  $\mathbb{C}$  is the complex domain of the Fourier representations.  $\text{Vec}(\cdot)$  is the vectorisation operator that flattens the matrix to one dimension.  $\text{diag}(\cdot)$  returns a square diagonal matrix with the elements of the vector on its diagonal.

We can rewrite Eqn. (4) as minimising the following function w.r.t.  $\mathbf{f}$ ,

$$\mathcal{H}(\mathbf{f}) = \|\mathbf{A}\mathbf{f} - \mathbf{b}\|^2 + \lambda_2 \|\mathbf{f} - \mathbf{f}_{t-1}\|^2 + \frac{\mu}{2} \left\| \mathbf{f} - \mathbf{f}' + \frac{\mathbf{r}}{\mu} \right\|^2. \quad (5)$$

Setting  $\partial\mathcal{H}/\partial\mathbf{f} = 0$ , we can obtain the closed-form solution,

$$\mathbf{f} = \left( \mathbf{A}^H \mathbf{A} + \lambda_2 \mathbf{I} + \frac{\mu}{2} \mathbf{I} \right)^{-1} \left( \mathbf{A}^H \mathbf{b} + \lambda_2 \mathbf{f}_{t-1} + \frac{\mu}{2} \mathbf{f}' - \frac{\mathbf{r}}{2} \right). \quad (6)$$

$\cdot^H$  denotes the Hermitian transpose. Note that the term  $\mathbf{A}^H \mathbf{A} + \lambda_2 \mathbf{I} + \frac{\mu}{2} \mathbf{I}$  is of size  $CN^2 \times CN^2$ . Hence, it is impossible to calculate its inverse matrix in a real time situation. Revisiting Eqn. (5), we find that it can further be decomposed into the following sub linear system,

$$\left( \mathbf{A}[i] \mathbf{A}[i]^H + \lambda_2 \mathbf{I} + \frac{\mu}{2} \mathbf{I} \right) \mathbf{f}[i] = \mathbf{A}[i] \mathbf{b}[i] + \lambda_2 \mathbf{f}_{t-1}[i] + \frac{\mu}{2} \mathbf{f}'[i] - \frac{\mathbf{r}[i]}{2}, \quad (7)$$

where  $\mathbf{f}[i] \in \mathbb{C}^C$  denotes the elements across all  $C$  channels in the  $i$ -th spatial unit,  $i = 1, 2, \dots, N^2$ . A similar meaning applies to the notation  $\mathbf{A}[i] \in \mathbb{C}^C$ ,  $\mathbf{b}[i] \in \mathbb{C}$  and  $\mathbf{r}[i] \in \mathbb{C}^C$ . Based on the Sherman-Morrison-Woodbury formula, we can obtain the closed-form solution of Eqn. (7) as (Petersen and Pedersen, 2008),

$$\begin{aligned} \mathbf{f}[i] &= \frac{1}{\lambda_2 + \mu} \left( \mathbf{I} - \frac{\mathbf{A}[i] \mathbf{A}[i]^H}{\lambda_2 + \frac{\mu}{2} + \mathbf{A}[i]^H \mathbf{A}[i]} \right) \\ &\quad \times \left( \mathbf{A}[i] \mathbf{b}[i] + \lambda_2 \mathbf{f}_{t-1}[i] + \frac{\mu}{2} \mathbf{f}'[i] - \frac{\mathbf{b}[i]}{2} \right) \end{aligned} \quad (8)$$

Transforming the vectorised variables back to Eqn. 4, the closed-form solution of the sub-problem can be obtained as:

$$\hat{\mathbf{w}}[m, n] = \frac{1}{\lambda_2 + \mu} \left( \mathbf{I} - \frac{\hat{\mathbf{x}}[m, n] \hat{\mathbf{x}}[m, n]^T}{\lambda_2 + \frac{\mu}{2} + \hat{\mathbf{x}}[m, n]^T \hat{\mathbf{x}}[m, n]} \right) \mathbf{g} \quad (9)$$

where vector  $\hat{\mathbf{w}}[m, n] = [\hat{w}_{m,n}^1, \hat{w}_{m,n}^2, \dots, \hat{w}_{m,n}^C] \in \mathbb{C}^C$  denotes the  $m$ -th row  $n$ -th column units of  $\hat{\mathbf{W}}$  through all the  $C$  channels, and  $\mathbf{g} = \hat{\mathbf{x}}[m, n] \hat{y}[m, n] + \frac{\mu}{2} \hat{\mathbf{w}}'[m, n] + \lambda_2 \hat{\mathbf{w}}_{t-1}[m, n] - \frac{\tilde{\gamma}[m, n]}{2}$ .

## 1.2 Updating $\mathcal{W}'$

To optimise  $\mathcal{W}'$ , we minimise the following sub-problem (Yuan and Lin, 2006):

$$\mathcal{W}' = \arg \min_{\mathcal{W}'} \lambda_1 \sum_{j=1}^C \left\| \mathbf{W}'^j \right\|_F + \frac{\mu}{2} \sum_{j=1}^C \left\| \mathbf{W}^j - \mathbf{W}'^j + \frac{\mathbf{I}^j}{\mu} \right\|_F^2. \quad (10)$$

Eqn. 10 can be separated to each channel:

$$\mathbf{W}'^j = \arg \min_{\mathbf{W}'^j} \lambda_1 \left\| \mathbf{W}'^j \right\|_F + \frac{\mu}{2} \left\| \mathbf{W}^j - \mathbf{W}'^j + \frac{\mathbf{I}^j}{\mu} \right\|_F^2. \quad (11)$$

Setting the derivative of Eqn. (11) to zero, we obtain  $\frac{\lambda_1 \mathbf{W}'^j}{\mu \|\mathbf{W}'^j\|_F} + \mathbf{W}'^j = \mathbf{H}^j$ , where  $\mathbf{H}^j = \mathbf{W}^j + \mathbf{I}^j/\mu$ .  $\frac{\mathbf{W}'^j}{\|\mathbf{W}'^j\|_F}$  is the unit representation of  $\mathbf{W}'^j$ . Therefore,  $\mathbf{W}'^j$  and  $\mathbf{H}^j$  share the same geometric direction, indicating the exchangeability between

the unit  $\frac{\lambda_1 \mathbf{W}'^j}{\mu \|\mathbf{W}'^j\|_F}$  and  $\frac{\lambda_1 \mathbf{H}^j}{\mu \|\mathbf{H}^j\|_F}$ . The closed-form optimal solution can directly be derived as [Yang et al. \(2011\)](#):

$$\mathbf{W}'^j = \max \left( 0, 1 - \frac{\lambda_1}{\mu \|\mathbf{H}^j\|_F} \right) \mathbf{H}^j. \quad (12)$$

It is clear that  $\mathbf{W}'^j$  tends to shrink to zero by collaboratively integrating the constraints imposed by all the  $N \times N$  features among the  $j$ -th channel.

### 1.3 Updating other variables

In each iteration, the penalty  $\mu$  and the multiplier  $\boldsymbol{\Gamma}$  are updated as:

$$\begin{aligned} \boldsymbol{\Gamma} &= \boldsymbol{\Gamma} + \mu (\mathcal{W} - \mathcal{W}'), \\ \mu &= \min(\rho\mu, \mu_{\max}), \end{aligned} \quad (13)$$

where  $\rho$  controls the strictness of the penalty in each iteration and  $\mu_{\max}$  is the maximal penalty value. A parameter  $K$  is used to control the maximum number of iterations. As each sub-problem is convex, the convergence of our optimisation is guaranteed ([Boyd et al., 2010](#)).

## References

- Boyd S, Parikh N, Chu E, Peleato B, Eckstein J (2010) Distributed optimization and statistical learning via the alternating direction method of multipliers. *Foundations and Trends in Machine Learning* 3(1):1–122
- Gray RM (2006) Toeplitz and circulant matrices : a review. *Foundations and Trends in Communications and Information Theory* 2(3):155–239
- Henriques JF, Rui C, Martins P, Batista J (2015) High-speed tracking with kernelized correlation filters. *IEEE Transactions on Pattern Analysis and Machine Intelligence* 37(3):583–596
- Petersen K, Pedersen M (2008) The matrix cookbook. technical university of denmark. Technical Manual
- Yang Y, Shen HT, Ma Z, Huang Z, Zhou X (2011) l2, 1-norm regularized discriminative feature selection for unsupervised learning. In: *Proceedings-international joint conference on artificial intelligence*, pp 1589–1594
- Yuan M, Lin Y (2006) Model selection and estimation in regression with grouped variables. *Journal of the Royal Statistical Society: Series B (Statistical Methodology)* 68(1):49–67
